# Supplementary material for: Long term cycling studies of electrospun TiO2nanostructures and their composites with MWCNTs for rechargeable Li-ion batteries
Source: Royal Society of Chemistry journal article supplement (doi:10.1039/c1ra00514f), 2011-11-11
Supplement: c1ra00514f.pdf [file c1ra00514f.pdf]

# Long term cycling studies of electrospun TiO<sub>2</sub> nanostructures and their composites with MWCNTs for rechargeable Li -ion batteries

Zhu Peining †<sup>a, b</sup>, Wu Yongzhi †<sup>b, c</sup>, M. V. Reddy <sup>d, \*</sup> A. Sreekumaran Nair <sup>b, \*</sup> B. V. R. Chowdari <sup>d</sup>, and S. Ramakrishna <sup>b, e</sup>

<sup>a</sup> *Department of Mechanical Engineering, National University of Singapore, Singapore 117574, Singapore*

<sup>b</sup> *Healthcare and Energy Materials Laboratory, National University of Singapore, Singapore 117581, Singapore*

<sup>c</sup> *NUS Graduate School for Integrative Sciences and Engineering, Singapore 117456, Singapore*

<sup>d</sup> *Department of Physics, National University of Singapore, Singapore 117542*

<sup>e</sup> *King Saud University, Riyadh 11451, Kingdom of Saudi Arabia*

† *These two authors contributed equally in the research work.*

Corresponding authors: [phymvvr@nus.edu.sg](mailto:phymvvr@nus.edu.sg) (M. V. Reddy), [nniansn@nus.edu.sg](mailto:nniansn@nus.edu.sg) (A. S. Nair)

## Supporting Information 1

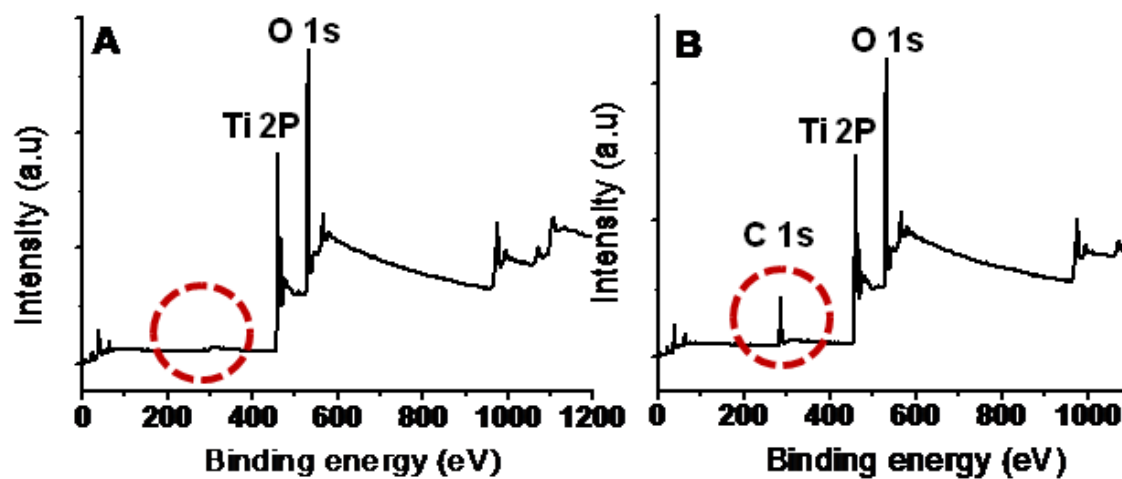

XPS spectra of  $\text{TiO}_2$  (A) and  $\text{TiO}_2\text{-CNT}$  (B)

## Supporting Information 2

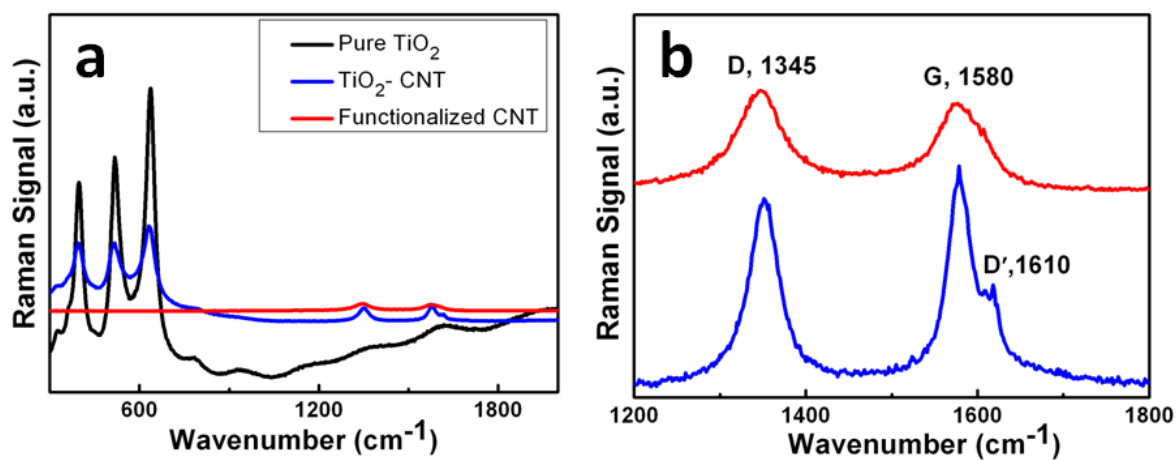

Raman spectra of  $\text{TiO}_2$  (black trace), functionalized MWCNTs (red trace), and  $\text{TiO}_2$ - MWCNTs (blue trace)

### Supporting Information 3

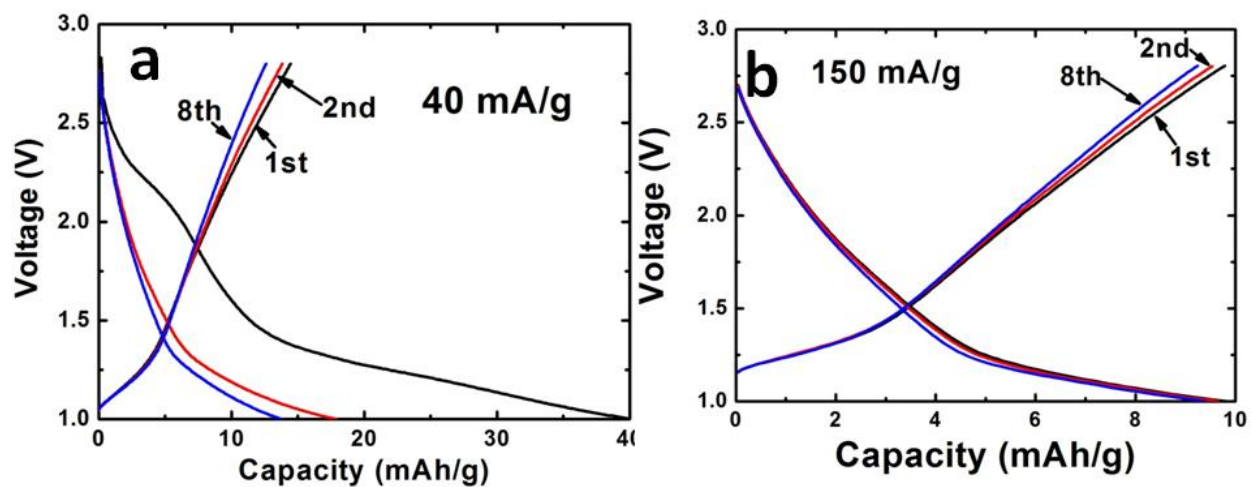

Galvanostatic discharge-charge cycling curves (voltage vs. capacity profiles) of CNTs (electrode composition 80:20 PVDF). Current rate: (a) 40 mA g<sup>-1</sup> (0.12 C rate) and (b) 150 mA g<sup>-1</sup> (0.45 C rate). Li metal was the counter and reference electrodes. Potential window: 1.0-2.8 V.
